# Supplementary material for: Green synthesis and characterization of Ag nanoparticles in a phytic acid/ascorbic acid/sodium hydroxide system and their application in the electrochemical detection of H2O2
Source: Royal Society of Chemistry journal article supplement (doi:10.1039/d2nj06332h), 2023-01-01
Supplement: d2nj06332h1.pdf [file d2nj06332h1.pdf]

**Supplemental file**

**Green synthesis and characterization of Ag nanoparticles in phytic acid/ascorbic acid/sodium hydroxide system and their application in electrochemical detection of H<sub>2</sub>O<sub>2</sub>**

Baolong Niu <sup>a, b \*\*</sup>, Hong Wang <sup>a, b</sup>, Yanwei Zhang <sup>a, b</sup>, Bin Nie <sup>a, b</sup>, Huifang Wang <sup>b</sup>, Xiaojie Lian <sup>c, d</sup>,

Wenfeng Li <sup>a, b \*</sup>

<sup>a</sup>College of Materials Science and Engineering, Taiyuan University of Technology, Taiyuan 030024, PR China;

<sup>b</sup>Key Laboratory of Interface Science and Engineering in Advanced Materials, Taiyuan University of Technology, Ministry of Education, Taiyuan 030024, PR China;

<sup>c</sup>Department of Biomedical Engineering, Research Center for Nano-biomaterials & Regenerative Medicine, College of Biomedical Engineering, Taiyuan University of Technology, Taiyuan 030024, PR China;

<sup>d</sup>Shanxi Key Laboratory of Material Strength & Structural Impact, Institute of Biomedical Engineering, Taiyuan University of Technology, Taiyuan 030024, PR China.

\*Corresponding author

**Baolong Niu**

Address: College of Materials Science and Engineering, Taiyuan University of Technology, Key Laboratory of Interface Science and Engineering in Advanced Materials, Taiyuan 030024, PR China

Phone: 0086-351-6111197

Fax: 0086-351-6111190

E-mail: baolongniutyut@hotmail.com

**Wenfeng Li**

Address: College of Materials Science and Engineering, Taiyuan University of Technology, Key Laboratory of Interface Science and Engineering in Advanced Materials, Taiyuan 030024, PR China

Phone:0086-351-6111197

Fax: 0086-351-6111190

## 29 1. Materials and methods

### 30 1.1. Orthogonal test

31 The factors and levels of the orthogonal test were shown in Table S1. Since the  
 32 orthogonal experiment involved 6 factors and 5 levels, the orthogonal table ( $L_{25}(5^6)$ ) as  
 33 shown in Table S2 was designed. Then, the factors and levels were corresponding to  
 34 the orthogonal table ( $L_{25}(5^6)$ ) to obtain the experimental program, as shown in Table  
 35 S3.

36 Table S1. Factors and levels of orthogonal test.

| Factor<br>Level | A                                          | B            | C            | D                       | E                       | F                            |
|-----------------|--------------------------------------------|--------------|--------------|-------------------------|-------------------------|------------------------------|
|                 | Concentration of<br>AgNO <sub>3</sub> (mM) | PA<br>dosage | AA<br>dosage | The pH of<br>solution A | The pH of<br>solution C | Reaction<br>temperature (°C) |
| 1               | 7                                          | 0.5:1        | 0.5:1        | 7                       | 7                       | 25                           |
| 2               | 8                                          | 1:1          | 1:1          | 8                       | 8                       | 40                           |
| 3               | 9                                          | 2:1          | 2:1          | 9                       | 9                       | 50                           |
| 4               | 10                                         | 3:1          | 3:1          | 10                      | 10                      | 60                           |
| 5               | 11                                         | 4:1          | 4:1          | 11                      | 11                      | 70                           |

37 Note: PA and AA dosage were expressed as n(PA):n(AgNO<sub>3</sub>) and n(AA):n(AgNO<sub>3</sub>), respectively.

38 Table S2. Orthogonal table ( $L_{25}(5^6)$ ).

| Test number | Column |   |   |   |   |   |
|-------------|--------|---|---|---|---|---|
|             | 1      | 2 | 3 | 4 | 5 | 6 |
| 1           | 1      | 1 | 1 | 1 | 1 | 1 |
| 2           | 1      | 2 | 2 | 2 | 2 | 2 |
| 3           | 1      | 3 | 3 | 3 | 3 | 3 |
| 4           | 1      | 4 | 4 | 4 | 4 | 4 |
| 5           | 1      | 5 | 5 | 5 | 5 | 5 |
| 6           | 2      | 1 | 2 | 3 | 4 | 5 |
| 7           | 2      | 2 | 3 | 4 | 5 | 1 |
| 8           | 2      | 3 | 4 | 5 | 1 | 2 |
| 9           | 2      | 4 | 5 | 1 | 2 | 3 |
| 10          | 2      | 5 | 1 | 2 | 3 | 4 |
| 11          | 3      | 1 | 3 | 5 | 2 | 4 |
| 12          | 3      | 2 | 4 | 1 | 3 | 5 |

|    |   |   |   |   |   |   |
|----|---|---|---|---|---|---|
| 13 | 3 | 3 | 5 | 2 | 4 | 1 |
| 14 | 3 | 4 | 1 | 3 | 5 | 2 |
| 15 | 3 | 5 | 2 | 4 | 1 | 3 |
| 16 | 4 | 1 | 4 | 2 | 5 | 3 |
| 17 | 4 | 2 | 5 | 3 | 1 | 4 |
| 18 | 4 | 3 | 1 | 4 | 2 | 5 |
| 19 | 4 | 4 | 2 | 5 | 3 | 1 |
| 20 | 4 | 5 | 3 | 1 | 4 | 2 |
| 21 | 5 | 1 | 5 | 4 | 3 | 2 |
| 22 | 5 | 2 | 1 | 5 | 4 | 3 |
| 23 | 5 | 3 | 2 | 1 | 5 | 4 |
| 24 | 5 | 4 | 3 | 2 | 1 | 5 |
| 25 | 5 | 5 | 4 | 3 | 2 | 1 |

39

Table S3. Testing program.

| Test number | Combination of levels                                                                     | Test condition         |        |        |            |            |                           |
|-------------|-------------------------------------------------------------------------------------------|------------------------|--------|--------|------------|------------|---------------------------|
|             |                                                                                           | Concentration of       | PA     | AA     | The pH of  | The pH of  | Reaction temperature (°C) |
|             |                                                                                           | AgNO <sub>3</sub> (mM) | dosage | dosage | solution A | solution C |                           |
| 1           | A <sub>1</sub> B <sub>1</sub> C <sub>1</sub> D <sub>1</sub> E <sub>1</sub> F <sub>1</sub> | 7                      | 0.5:1  | 0.5:1  | 7          | 7          | 25                        |
| 2           | A <sub>1</sub> B <sub>2</sub> C <sub>2</sub> D <sub>2</sub> E <sub>2</sub> F <sub>2</sub> | 7                      | 1:1    | 1:1    | 8          | 8          | 40                        |
| 3           | A <sub>1</sub> B <sub>3</sub> C <sub>3</sub> D <sub>3</sub> E <sub>3</sub> F <sub>3</sub> | 7                      | 2:1    | 2:1    | 9          | 9          | 50                        |
| 4           | A <sub>1</sub> B <sub>4</sub> C <sub>4</sub> D <sub>4</sub> E <sub>4</sub> F <sub>4</sub> | 7                      | 3:1    | 3:1    | 10         | 10         | 60                        |
| 5           | A <sub>1</sub> B <sub>5</sub> C <sub>5</sub> D <sub>5</sub> E <sub>5</sub> F <sub>5</sub> | 7                      | 4:1    | 4:1    | 11         | 11         | 70                        |
| 6           | A <sub>2</sub> B <sub>1</sub> C <sub>2</sub> D <sub>3</sub> E <sub>4</sub> F <sub>5</sub> | 8                      | 0.5:1  | 1:1    | 9          | 10         | 70                        |
| 7           | A <sub>2</sub> B <sub>2</sub> C <sub>3</sub> D <sub>4</sub> E <sub>5</sub> F <sub>1</sub> | 8                      | 1:1    | 2:1    | 10         | 11         | 25                        |
| 8           | A <sub>2</sub> B <sub>3</sub> C <sub>4</sub> D <sub>5</sub> E <sub>1</sub> F <sub>2</sub> | 8                      | 2:1    | 3:1    | 11         | 7          | 40                        |
| 9           | A <sub>2</sub> B <sub>4</sub> C <sub>5</sub> D <sub>1</sub> E <sub>2</sub> F <sub>3</sub> | 8                      | 3:1    | 4:1    | 7          | 8          | 50                        |
| 10          | A <sub>2</sub> B <sub>5</sub> C <sub>1</sub> D <sub>2</sub> E <sub>3</sub> F <sub>4</sub> | 8                      | 4:1    | 0.5:1  | 8          | 9          | 60                        |
| 11          | A <sub>3</sub> B <sub>1</sub> C <sub>3</sub> D <sub>5</sub> E <sub>2</sub> F <sub>4</sub> | 9                      | 0.5:1  | 2:1    | 11         | 8          | 60                        |
| 12          | A <sub>3</sub> B <sub>2</sub> C <sub>4</sub> D <sub>1</sub> E <sub>3</sub> F <sub>5</sub> | 9                      | 1:1    | 3:1    | 7          | 9          | 70                        |
| 13          | A <sub>3</sub> B <sub>3</sub> C <sub>5</sub> D <sub>2</sub> E <sub>4</sub> F <sub>1</sub> | 9                      | 2:1    | 4:1    | 8          | 10         | 25                        |
| 14          | A <sub>3</sub> B <sub>4</sub> C <sub>1</sub> D <sub>3</sub> E <sub>5</sub> F <sub>2</sub> | 9                      | 3:1    | 0.5:1  | 9          | 11         | 40                        |
| 15          | A <sub>3</sub> B <sub>5</sub> C <sub>2</sub> D <sub>4</sub> E <sub>1</sub> F <sub>3</sub> | 9                      | 4:1    | 1:1    | 10         | 7          | 50                        |
| 16          | A <sub>4</sub> B <sub>1</sub> C <sub>4</sub> D <sub>2</sub> E <sub>5</sub> F <sub>3</sub> | 10                     | 0.5:1  | 3:1    | 8          | 11         | 50                        |
| 17          | A <sub>4</sub> B <sub>2</sub> C <sub>5</sub> D <sub>3</sub> E <sub>1</sub> F <sub>4</sub> | 10                     | 1:1    | 4:1    | 9          | 7          | 60                        |

|    |                                                                                           |    |       |       |    |    |    |
|----|-------------------------------------------------------------------------------------------|----|-------|-------|----|----|----|
| 18 | A <sub>4</sub> B <sub>3</sub> C <sub>1</sub> D <sub>4</sub> E <sub>2</sub> F <sub>5</sub> | 10 | 2:1   | 0.5:1 | 10 | 8  | 70 |
| 19 | A <sub>4</sub> B <sub>4</sub> C <sub>2</sub> D <sub>5</sub> E <sub>3</sub> F <sub>1</sub> | 10 | 3:1   | 1:1   | 11 | 9  | 25 |
| 20 | A <sub>4</sub> B <sub>5</sub> C <sub>3</sub> D <sub>1</sub> E <sub>4</sub> F <sub>2</sub> | 10 | 4:1   | 2:1   | 7  | 10 | 40 |
| 21 | A <sub>5</sub> B <sub>1</sub> C <sub>5</sub> D <sub>4</sub> E <sub>3</sub> F <sub>2</sub> | 11 | 0.5:1 | 4:1   | 10 | 9  | 40 |
| 22 | A <sub>5</sub> B <sub>2</sub> C <sub>1</sub> D <sub>5</sub> E <sub>4</sub> F <sub>3</sub> | 11 | 1:1   | 0.5:1 | 11 | 10 | 50 |
| 23 | A <sub>5</sub> B <sub>3</sub> C <sub>2</sub> D <sub>1</sub> E <sub>5</sub> F <sub>4</sub> | 11 | 2:1   | 1:1   | 7  | 11 | 60 |
| 24 | A <sub>5</sub> B <sub>4</sub> C <sub>3</sub> D <sub>2</sub> E <sub>1</sub> F <sub>5</sub> | 11 | 3:1   | 2:1   | 8  | 7  | 70 |
| 25 | A <sub>5</sub> B <sub>5</sub> C <sub>4</sub> D <sub>3</sub> E <sub>2</sub> F <sub>1</sub> | 11 | 4:1   | 3:1   | 9  | 8  | 25 |

## 40 1.2. Stability test of Ag NPs@PA

### 41 1.2.1. Stability of storage

42 In order to clarify the storage stability of Ag NPs@PA sol at 4 °C, in this  
43 experiment, the sols stored at 4 °C for different times (0, 1, 3, 5, and 6 weeks) were  
44 tested using UV spectrophotometer. The samples were diluted 20 times for each test,  
45 and three parallel experiments were performed and the average value was taken. The  
46 relative stability is the ratio of the absorption peak intensity of each test to the  
47 absorption peak intensity of the initial storage time.

### 48 1.2.2. pH stability

49 To verify the stability of Ag NPs@PA under different harsh conditions, some  
50 experiments were carried out on the sol under different pH environments <sup>1</sup>. Firstly,  
51 deionized water with different pH (6–14) was configured. The samples were then  
52 diluted 20-fold with deionized water of different pH, and the mixture was incubated for  
53 2 hours at room temperature. Finally, the mixture was transferred to a quartz cuvette for  
54 absorbance measurement, and three parallel experiments were performed for each  
55 group and the average value was taken. The highest value was defined as 100% relative  
56 stability.

### 57 1.2.3 Stability of temperature

58 In addition to different pH environments, further experiments were carried out at  
59 different temperatures <sup>1</sup>. The samples were first diluted 20-fold, and then the dispersions  
60 were incubated at different temperatures (4, 25, 30, 60, 70 °C) for 2 h. Finally,  
61 absorbance measurements were performed in a quartz cuvette. Similarly, three parallel  
62 experiments were performed for each group and the average value was taken. The

highest value was defined as 100% relative stability.

### 1.3. Selectivity of electrochemical H<sub>2</sub>O<sub>2</sub> sensors

The time-current test was used to detect 6 substances including 0.1 mM H<sub>2</sub>O<sub>2</sub>, 1 mM NaCl, 1 mM citric acid (CA), 1 mM urea, 1 mM glucose (Glu) and 1 mM ascorbic acid (AA) using sensors. The test potential was -0.5 V vs SCE.

### 1.4. Anti-interference of electrochemical H<sub>2</sub>O<sub>2</sub> sensor

Sensors were used to detect the changes of the electrochemical response signal of 1 mM H<sub>2</sub>O<sub>2</sub> in the presence and absence of 1 mM NaCl, 1 mM citric acid, 1 mM urea, 1 mM glucose and 1 mM ascorbic acid.

### 1.5. Repeatability and reproducibility of electrochemical H<sub>2</sub>O<sub>2</sub> sensors

The same sensor was used to detect 1 mM H<sub>2</sub>O<sub>2</sub> for four times, and the electrochemical response signal was compared to verify the repeatability of the sensor. In addition, three electrodes were made by the same method to detect 1 mM H<sub>2</sub>O<sub>2</sub>, and the relative standard deviation (RSD) was calculated to study the reproducibility of the sensor.

### 1.6. Test of electrochemical H<sub>2</sub>O<sub>2</sub> sensor in real samples

In order to evaluate the feasibility of the simple electrochemical H<sub>2</sub>O<sub>2</sub> sensor in practical application, this sensor was used to detect the electrochemical response signal when 500 μM H<sub>2</sub>O<sub>2</sub> was added to real samples such as purified water, tap water and Fenhe water, and the recovery rate of each water sample was studied.

## 2. Results and discussion

### 2.1. Optimization of preparation conditions for Ag NPs@PA

Table S4. Analysis of test results.

| T-Values       | Peak position (nm) |      |        |        |      |        | Half-peak width (nm) |         |        |         |         |         | Peak intensity (a.u.) |       |       |       |       |       |
|----------------|--------------------|------|--------|--------|------|--------|----------------------|---------|--------|---------|---------|---------|-----------------------|-------|-------|-------|-------|-------|
|                | A                  | B    | C      | D      | E    | F      | A                    | B       | C      | D       | E       | F       | A                     | B     | C     | D     | E     | F     |
| T <sub>1</sub> | 2056.5             | 2300 | 2089.5 | 2091.5 | 2056 | 2106.5 | 1159.73              | 1218.33 | 921.56 | 1041.59 | 988.65  | 1476.37 | 6.441                 | 8.877 | 6.596 | 7.221 | 8.147 | 3.675 |
| T <sub>2</sub> | 1981               | 2018 | 1992.5 | 2100   | 2026 | 2144.5 | 787.34               | 973.53  | 953.68 | 1258.97 | 1101.13 | 1108.69 | 8.259                 | 8.214 | 7.445 | 6.305 | 7.956 | 6.471 |

|                                                                                           |         |         |         |         |         |         |         |         |                |
|-------------------------------------------------------------------------------------------|---------|---------|---------|---------|---------|---------|---------|---------|----------------|
|                                                                                           | 6.883   | 9.58    | 11.398  | 0.735   | 1.2942  | 1.3766  | 1.916   | 2.2796  | F <sub>5</sub> |
|                                                                                           | 6.232   | 7.503   | 8.169   | 1.6294  | 1.5912  | 1.2464  | 1.5006  | 1.6338  | E <sub>5</sub> |
|                                                                                           | 7.93    | 6.793   | 9.758   | 1.4442  | 1.261   | 1.586   | 1.3586  | 1.9516  | D <sub>5</sub> |
|                                                                                           | 9.727   | 6.523   | 7.716   | 1.3192  | 1.489   | 1.9454  | 1.3046  | 1.5432  | C <sub>3</sub> |
|                                                                                           | 7.684   | 6.437   | 6.795   | 1.7754  | 1.6428  | 1.5368  | 1.2874  | 1.359   | B <sub>1</sub> |
|                                                                                           | 8.349   | 7.05    | 7.908   | 1.2882  | 1.6518  | 1.6698  | 1.41    | 1.5816  | A <sub>3</sub> |
|                                                                                           | 1109.63 | 772.21  | 571.83  | 295.274 | 221.738 | 221.926 | 154.442 | 114.366 | F <sub>5</sub> |
|                                                                                           | 986.76  | 1029.29 | 932.29  | 197.73  | 220.226 | 197.352 | 205.858 | 186.458 | E <sub>5</sub> |
|                                                                                           | 879.96  | 1265.59 | 592.62  | 208.318 | 251.794 | 175.992 | 253.118 | 118.524 | D <sub>5</sub> |
|                                                                                           | 741.95  | 1287.33 | 1134.21 | 184.312 | 190.736 | 148.39  | 257.466 | 226.842 | C <sub>3</sub> |
|                                                                                           | 921.55  | 885.63  | 1039.69 | 243.666 | 194.706 | 184.31  | 177.126 | 207.938 | B <sub>4</sub> |
|                                                                                           | 971.64  | 1013.22 | 1106.8  | 231.946 | 157.468 | 194.328 | 202.644 | 221.36  | A <sub>2</sub> |
|                                                                                           | 2067.5  | 1963    | 1996    | 421.3   | 428.9   | 413.5   | 392.6   | 399.2   | F <sub>4</sub> |
|                                                                                           | 2148.5  | 1984.5  | 2062.5  | 411.2   | 405.2   | 429.7   | 396.9   | 412.5   | E <sub>4</sub> |
|                                                                                           | 2008.5  | 2081.5  | 1996    | 418.3   | 420     | 401.7   | 416.3   | 399.2   | D <sub>5</sub> |
|                                                                                           | 1980.5  | 2059    | 2156    | 417.9   | 398.5   | 396.1   | 411.8   | 431.2   | C <sub>3</sub> |
|                                                                                           | 2003.5  | 1955.5  | 2000.5  | 460     | 403.6   | 400.7   | 391.1   | 400.1   | B <sub>4</sub> |
|                                                                                           | 2012    | 2076    | 2152    | 411.3   | 396.2   | 402.4   | 415.2   | 430.4   | A <sub>2</sub> |
| T <sub>3</sub>                                                                            |         |         |         |         |         |         |         |         |                |
| T <sub>4</sub>                                                                            |         |         |         |         |         |         |         |         |                |
| T <sub>5</sub>                                                                            |         |         |         |         |         |         |         |         |                |
| t <sub>1</sub>                                                                            |         |         |         |         |         |         |         |         |                |
| t <sub>2</sub>                                                                            |         |         |         |         |         |         |         |         |                |
| t <sub>3</sub>                                                                            |         |         |         |         |         |         |         |         |                |
| t <sub>4</sub>                                                                            |         |         |         |         |         |         |         |         |                |
| t <sub>5</sub>                                                                            |         |         |         |         |         |         |         |         |                |
| Relatively excellent level                                                                |         |         |         |         |         |         |         |         |                |
| Combination of levels                                                                     |         |         |         |         |         |         |         |         |                |
| A <sub>2</sub> B <sub>4</sub> C <sub>3</sub> D <sub>5</sub> E <sub>4</sub> F <sub>4</sub> |         |         |         |         |         |         |         |         |                |
| A <sub>2</sub> B <sub>4</sub> C <sub>3</sub> D <sub>5</sub> E <sub>5</sub> F <sub>5</sub> |         |         |         |         |         |         |         |         |                |
| A <sub>3</sub> B <sub>1</sub> C <sub>3</sub> D <sub>5</sub> E <sub>5</sub> F <sub>5</sub> |         |         |         |         |         |         |         |         |                |

## 86 2.2. Morphology of Ag NPs@PA

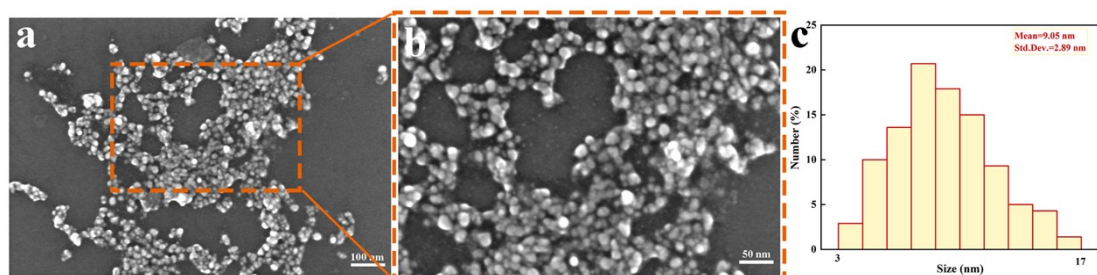

87

88 Figure S1. SEM images of Ag NPs@PA at (a) 100000、(b) 200000 magnification times and their  
89 (c) particle size distribution.

90 Figure S1a, b displayed SEM images of Ag NPs@PA at different magnifications.  
91 It can be seen from the figure that the morphology of Ag NPs@PA is almost spherical,  
92 and the particles are monodisperse, which was the same as the conclusion obtained in  
93 TEM. In addition, statistics were also carried out for the nanoparticles in Figure S1b,  
94 and the particle size distribution results were shown in Figure S1c. The particle size  
95 distribution ranged from 3-17 nm and the average particle size is 9.05 nm, which was  
96 consistent with the conclusion of TEM.

### 97 2.3. Stability of Ag NPs@PA

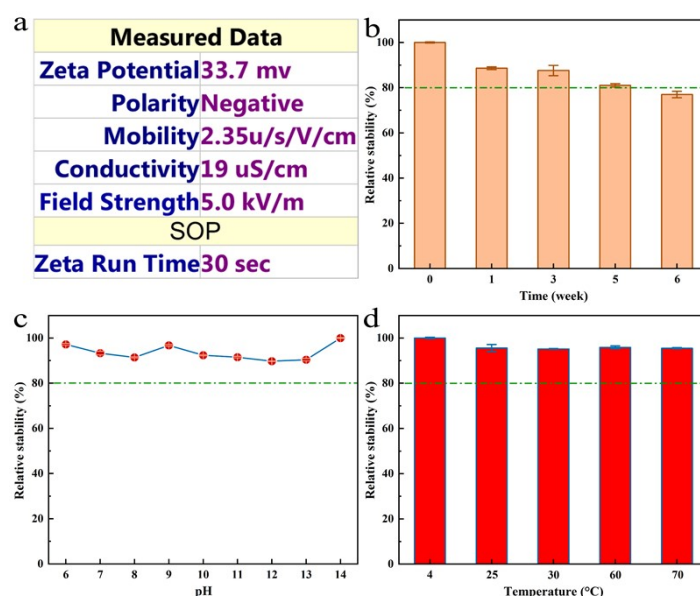

98  
99 Figure S2. (a)ZETA potential of Ag NPs@PA and their stability under different conditions:  
100 (b)time, (c)pH, (d)temperature.

101 The stability of sol is closely related to the convenience of storage and further  
102 application. It has been reported that nanoparticle sol is stable when its ZETA potential  
103 range is beyond  $\pm 20$  mV<sup>2</sup>. Figure S2a exhibited that the ZETA potential of the Ag  
104 NPs@PA sol is -33.7 mV, indicating that the Ag NPs@PA sol has sufficient stability,  
105 which was the result of PA acting as dispersant and stabilizer to play a steric hindrance  
106 and the same charge repulsion between particles to avoid agglomeration.

107 In addition, as shown in Figure S2b, the Ag NPs@PA sol was continuously  
108 monitored for 6 weeks, and it was found that the relative stability of the sol remained

109 above 80% after 5 weeks, which also indicated that the sol was very stable. This storage  
110 stability also depended on the effective coating of Ag NPs by PA and was significantly  
111 affected by the antioxidant properties of PA molecules. Its antioxidant ability was  
112 derived from the fact that each PA molecule can provide 6 pairs of hydrogen atoms to  
113 form a stable structure for the electrons of free radicals, thus replacing Ag NPs as the  
114 oxidized molecules.

115 In order to investigate the stability of the sol in practical application, two external  
116 environmental factors such as pH and temperature were also arranged to test the Ag  
117 NPs@PA sol. As can be seen from Figure S2c, the relative stability of the sol was much  
118 higher than 80% in the wide range (pH=6–14) of weak acid, neutral and basic,  
119 indicating that the sol has a strong environmental adaptability in terms of pH. This is  
120 because PA had a high degree of ionization in the pH range of weak acid, neutral and  
121 basic. The strong electrostatic repulsion between the PA coated on the surface of  
122 different Ag NPs ensured the stability of Ag NPs@PA. Figure S2d showed the stability  
123 test of Ag NPs@PA sol at different temperatures. No matter in low temperature storage  
124 environment, room temperature or near high preparation temperature, its relative  
125 stability was much higher than 80%, indicating that its stability did not depend on  
126 external temperature. Under the low temperature storage environment of 4 °C, the free  
127 movement of particles was very inactive, and agglomeration was difficult to occur  
128 under the obstruction of PA. With the increase of external temperature, the Brownian  
129 motion intensified and the probability of collision between particles increased.  
130 However, since Ag NPs were coated by PA, the agglomeration phenomenon was not  
131 obvious.

#### 132 **2.4. Selectivity of electrochemical H<sub>2</sub>O<sub>2</sub> sensors**

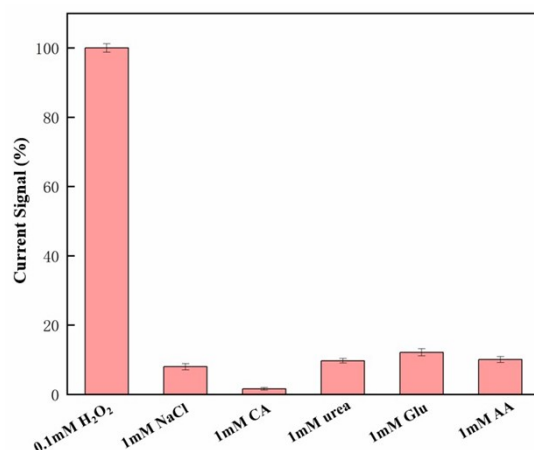

Figure S3. Selectivity of sensor.

To study the selectivity of the electrochemical H<sub>2</sub>O<sub>2</sub> sensor, the sensor was used to detect H<sub>2</sub>O<sub>2</sub>, NaCl, citric acid, urea, glucose and ascorbic acid, as shown in Figure S3. It can be found from the response signal in the figure that even though the concentration of H<sub>2</sub>O<sub>2</sub> was only 1/10 of the other interfering substances, its response signal was still much stronger than NaCl, citric acid, urea, glucose and ascorbic acid, which was enough to manifest that the sensor has excellent selectivity for the detection of H<sub>2</sub>O<sub>2</sub> <sup>3</sup>.

## 2.5. Anti-interference of electrochemical H<sub>2</sub>O<sub>2</sub> sensor

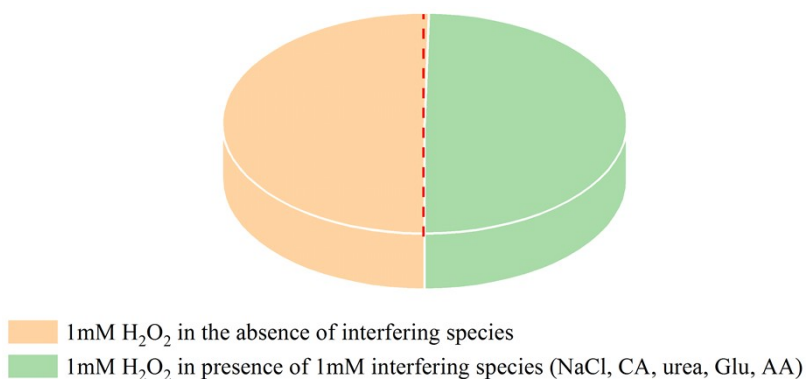

Figure S4. Anti-interference of electrochemical H<sub>2</sub>O<sub>2</sub> sensor

Besides selectivity, the anti-interference ability of the sensor was also investigated. Figure S4 exhibited the comparison of the response signals of the sensor to detect H<sub>2</sub>O<sub>2</sub> with or without interference. It can be seen intuitively that the response signal detected by the electrochemical H<sub>2</sub>O<sub>2</sub> sensor had little change in the presence or absence of interfering substances, which confirmed that the sensor demonstrated excellent anti-interference ability for the detection of H<sub>2</sub>O<sub>2</sub>, which was conducive to its further

151 practical application.

## 152 2.6. Repeatability and reproducibility of electrochemical H<sub>2</sub>O<sub>2</sub> sensors

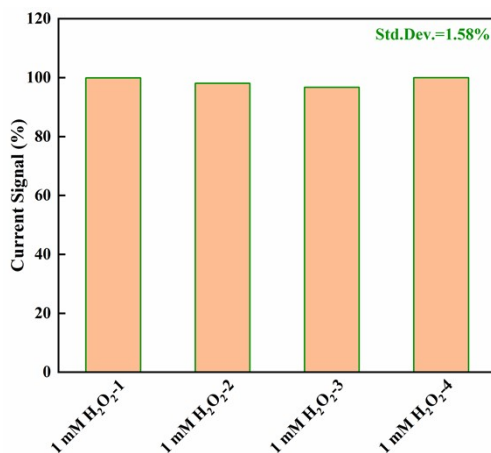

Figure S5. Repeatability of the sensor

153 Figure S5 revealed that the electrochemical H<sub>2</sub>O<sub>2</sub> sensor possesses good  
156 repeatability. The response signal corresponding to the same sensor detecting the same  
157 concentration of H<sub>2</sub>O<sub>2</sub> kept basically consistent, and the RSD of four tests was only  
158 1.58%, indicating that the sensor has good repeatability and can carry out continuous  
159 detection, which was of great significance for field detection. Reproducibility is another  
160 important sensor performance parameter. Reproducibility is another important sensor  
161 performance parameter. The RSD of three electrodes made by the same method to  
162 detect the same concentration of H<sub>2</sub>O<sub>2</sub> was 3.83%. Therefore, the reproducibility of the  
163 electrochemical H<sub>2</sub>O<sub>2</sub> sensor was also acceptable.

## 164 2.7. Application of electrochemical H<sub>2</sub>O<sub>2</sub> sensor in real samples

165 Table S5. Recovery rate (%) of H<sub>2</sub>O<sub>2</sub> detected by electrochemical H<sub>2</sub>O<sub>2</sub> sensor in actual samples.

| Sample         | H <sub>2</sub> O <sub>2</sub> recovered (μL) | Recovery rate (%) | RSD (%) |
|----------------|----------------------------------------------|-------------------|---------|
| PBS            | 500.0                                        | 100%              | 0       |
| Purified water | 504.5                                        | 100.09%           | 0.63    |
| Tap water      | 505.1                                        | 101.02%           | 0.72    |
| Fenhe water    | 463.8                                        | 92.76%            | 5.31    |

166 To evaluate the feasibility of the sensor in practical application, the  
167 electrochemical H<sub>2</sub>O<sub>2</sub> sensor was used to detect the actual samples of purified water,  
168 tap water and Fenhe water<sup>3</sup>. A standard concentration of 500 μM H<sub>2</sub>O<sub>2</sub> was added to a

169 given actual water sample, and the recovery of each water sample was researched, as  
170 shown in Table S5. It is observed from the table that the recovery rate of the sensor in  
171 the three practical samples was relatively ideal, ranging from 92.77% to 101.02%,  
172 which can be applied in practical detection.  
173

174 **References**

- 175 1. S.-B. He, P. Balasubramanian, Z.-W. Chen, Q. Zhang, Q.-Q. Zhuang, H.-P.  
176 Peng, H.-H. Deng, X.-H. Xia and W. Chen, *ACS applied materials & interfaces*,  
177 2020, **12**, 14876-14883.
- 178 2. A. M. El Badawy, T. P. Luxton, R. G. Silva, K. G. Scheckel, M. T. Suidan and T.  
179 M. Tolaymat, *ENVIRONMENTAL SCIENCE & TECHNOLOGY*, 2010, **44**,  
180 1260-1266.
- 181 3. S. Kumar, S. Chaudhary and G. R. Chaudhary, *MATERIALS SCIENCE AND*  
182 *ENGINEERING C-MATERIALS FOR BIOLOGICAL APPLICATIONS*, 2020,  
183 **114**.  
184
